# Supplementary material for: Association of human gut microbiota composition and metabolic functions with Ficus hirta Vahl dietary supplementation
Source: PubMed Central journal article supplement (PMC9515076; doi:10.1038/s41538-022-00161-3), 2022-09-27
Supplement: 41538_2022_161_MOESM1_ESM.pdf [file 41538_2022_161_MOESM1_ESM.pdf]

1 Association of human gut microbiota composition and metabolic functions with *Ficus hirta* Vahl

2 dietary supplementation

3 Ruiming Xiao <sup>ab</sup>, Guangjuan Luo <sup>ab</sup>, Wanci Liao <sup>ab</sup>, Shuting Chen <sup>ab</sup>, Shuangyan Han <sup>ab</sup>, Shuli Liang

4 <sup>ab</sup>, Ying Lin <sup>ab\*</sup>

5 <sup>a</sup>South China University of Technology South China Univ Technol, School of Biology & Biological

6 Engineering,

7 <sup>b</sup>Guangdong Key Lab Fermentation & Enzyme Engineering, Guangzhou 510006, Peoples R China.

8

9 \*Corresponding author: Ying Lin, South China Univ Technol, Sch Biol & Biol Engn, Guangdong

10 Key Lab Fermentat & Enzyme Engn, Guangzhou 510006, Peoples R China

11 E-mail: [feylin@scut.edu.cn](mailto:feylin@scut.edu.cn)

12

13

14

15

16

17

18

19

20

21

22

23 Supplementary Table 1. Daily ingredients formula in FHVD (n=25) and NFHVD (n=18) for each  
 24 people.

| Ingredient names | Food weight (g) |              | P value |
|------------------|-----------------|--------------|---------|
|                  | FHV Diet        | NFHV Diet    |         |
| Pork chops       | 25.08 ± 0.29    | 24.79 ± 0.50 | 0.433   |
| Maize            | 13.33 ± 0.33    | 13.14 ± 0.34 | 0.535   |
| Carrot           | 13.63 ± 0.52    | 13.58 ± 0.40 | 0.902   |
| FHV dried root   | 14.95 ± 0.28    | 0            | < 0.001 |

25 Supplementary Note 1: The pork chops, maize, and carrot were cut into 2-3 cm of length, the dried root of FHV  
 26 was cut into 0.2-0.4 cm of slice. Then, all ingredients were mixed and stewed in boiling water for 2 h. After  
 27 cooking, the ingredients were abandoned and the 250 mL of soup was collected for each participant. The data were  
 28 presented as Mean ± Standard deviation (SD) and analyzed by Student's t test,  $P < 0.05$  was regarded as a  
 29 significant difference.

30

31 Supplementary Table 2. Characteristics of participants in FHVD (n=25) and NFHVD (n=18) at  
 32 baseline.

|                          | FHV Diet        | NFHV Diet       | P value |
|--------------------------|-----------------|-----------------|---------|
| Age (years)              | 23.68 ± 2.84    | 23.00 ± 2.81    | 0.423   |
| BMI (kg/m <sup>2</sup> ) | 21.15 ± 2.13    | 20.87 ± 2.29    | 0.506   |
| Urea (mmol/L)            | 4.93 ± 1.23     | 4.96 ± 1.21     | 0.956   |
| CRE (μmol/L)             | 75.04 ± 15.47   | 79.55 ± 24.37   | 0.356   |
| UA (μmol/L)              | 334.82 ± 107.24 | 369.49 ± 117.34 | 0.360   |

|             |             |             |       |
|-------------|-------------|-------------|-------|
| BG (mmol/L) | 5.14 ± 0.38 | 5.23 ± 0.41 | 0.487 |
| TG (mmol/L) | 0.81 ± 0.24 | 0.86 ± 0.35 | 0.648 |
| TC (mmol/L) | 4.50 ± 0.71 | 4.51 ± 0.72 | 0.971 |
| Male/Female | 0.92        | 1.25        |       |

33 Supplementary Note 2: BMI: Body mass index; CRE: Creatinine; UA: Uric acid; BG: Blood Glucose; TG: Total  
34 triglycerides; TC: Total cholesterol. The data were presented as Mean ± Standard deviation (SD) and analyzed by  
35 Student's t test,  $P < 0.05$  was regarded as a significant difference.

36

37 Supplementary Table 3. Macronutrients intake comparison of participants in FHVD (n=25) and  
38 NFHVD (n=18) at sampling week.

| Nutrient         | FHVD             |                  |                | NFHVD            |                  |                |
|------------------|------------------|------------------|----------------|------------------|------------------|----------------|
|                  | Pre              | Post             | <i>P</i> value | Pre              | Post             | <i>P</i> value |
| Energy (kj)      | 1263.73 ± 432.60 | 1230.94 ± 396.72 | 0.290          | 1282.11 ± 270.03 | 1258.25 ± 195.35 | 0.468          |
| Protein (g)      | 56.24 ± 22.84    | 51.99 ± 19.31    | 0.143          | 53.76 ± 14.62    | 50.57 ± 8.14     | 0.347          |
| Carbohydrate (g) | 186.84 ± 66.03   | 181.87 ± 72.76   | 0.375          | 201.15 ± 62.11   | 203.88 ± 43.24   | 0.442          |
| Fat (g)          | 31.90 ± 16.11    | 31.23 ± 16.24    | 0.989          | 26.68 ± 10.99    | 24.69 ± 9.43     | 0.246          |
| Diet fiber (g)   | 6.46 ± 2.61      | 5.61 ± 2.14      | 0.726          | 5.02 ± 2.03      | 4.91 ± 1.72      | 0.152          |

39 Supplementary Note 3: The data were presented as Mean ± Standard deviation (SD) and analyzed by Student's t  
40 test,  $P < 0.05$  was regarded as a significant difference.

41

42 Supplementary Table 4. Blood biochemicals of participants in a preliminary experiment of FHVD  
43 intervention (n=9).

|               | FHVD-Pre       | FHVD-Post       | <i>P</i> value |
|---------------|----------------|-----------------|----------------|
| Urea (mmol/L) | 5.28 ± 1.66    | 5.01 ± 2.11     | 0.516          |
| CRE (μmol/L)  | 64.00 ± 14.82  | 66.00 ± 20.37   | 0.844          |
| UA (μmol/L)   | 362.42 ± 99.65 | 359.77 ± 103.57 | 0.999          |
| BG (mmol/L)   | 5.40 ± 0.24    | 5.45 ± 0.30     | 0.734          |
| TG (mmol/L)   | 0.74 ± 0.18    | 0.80 ± 0.32     | 0.531          |
| TC (mmol/L)   | 4.80 ± 0.84    | 4.69 ± 0.60     | 0.523          |
| Urea/CRE      | 0.09 ± 0.05    | 0.09 ± 0.06     | 0.984          |

44 Supplementary Note 4: CRE: Creatinine; UA: Uric acid; BG: Blood Glucose; TG: Total triglycerides; TC: Total  
 45 cholesterol. The data were presented as Mean ± Standard deviation (SD) and analyzed by Student's *t* test, *P*<0.05  
 46 was regarded as a significant difference.

47  
 48  
 49  
 50

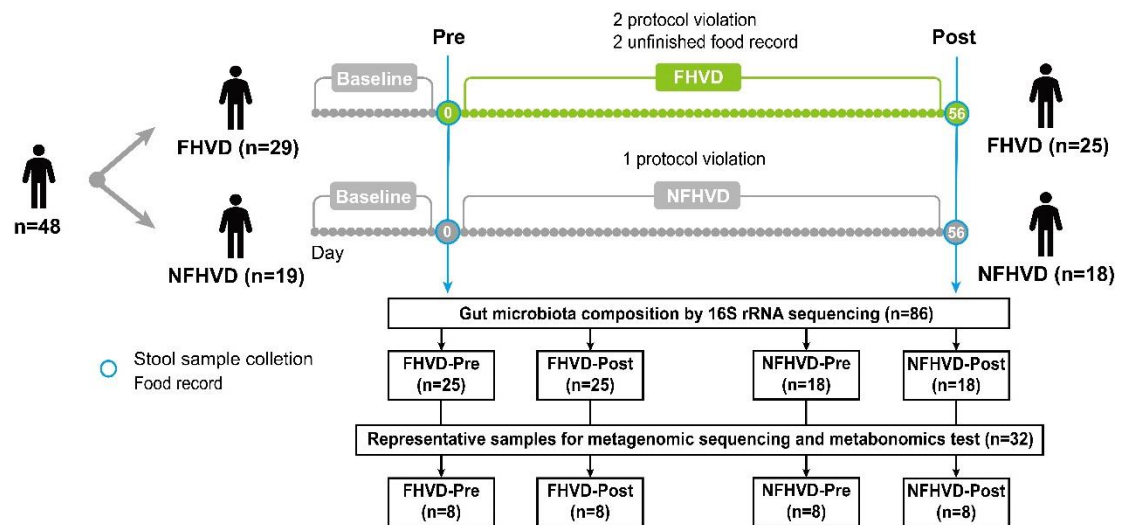

51

52 Supplementary Figure 1. Study design and flow diagram of data collection: Timeline of diet  
53 intervention, a two-weeks Run in period was set for stabilization and followed by 8-weeks  
54 intervention, fecal samples and corresponding food records was collected before and after  
55 intervention; By excluding unfitted samples, a total of 86 samples in FHVD-Pre (n=25), FHVD-  
56 Post (n=25), NFHVD-Pre (n=18), and NFHVD-Post (n=18) was involved to analyze gut microbial  
57 composition by 16S rRNA sequencing; MicroPITA was used to selected eight representative  
58 samples in each group for further metagenomic sequencing and metabolomic test. FHVD, *Ficus*  
59 *hirta Vahl* diet; NFHVD, non- *Ficus hirta Vahl* diet; Pre, before intervention; Post, after intervention;  
60 MicroPITA, microbiomes Picking Interesting Taxonomic Abundance.

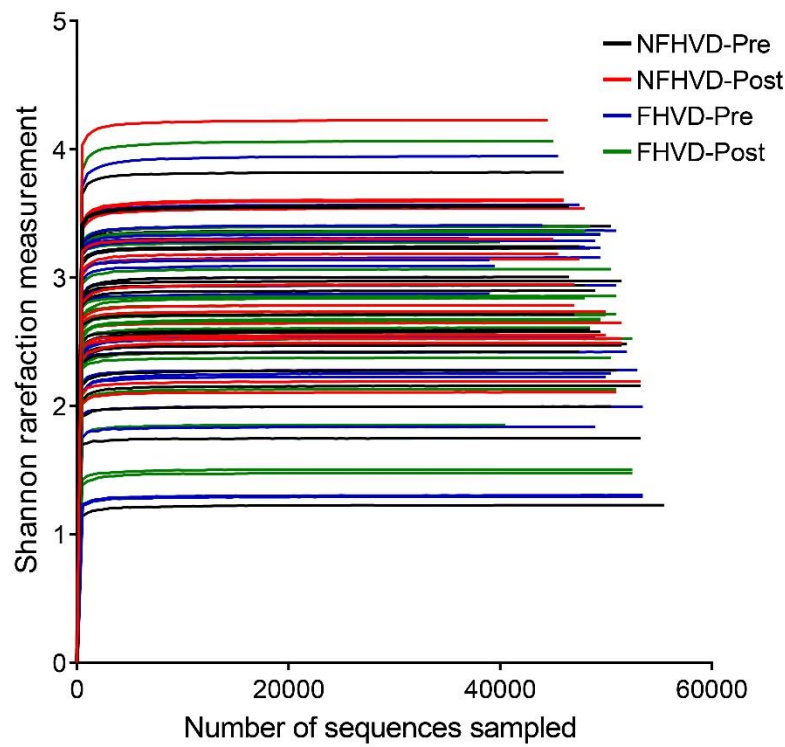

61  
62 Supplementary Figure 2. Shannon rarefaction curve of each sample in FHVD and NFHVD.

63

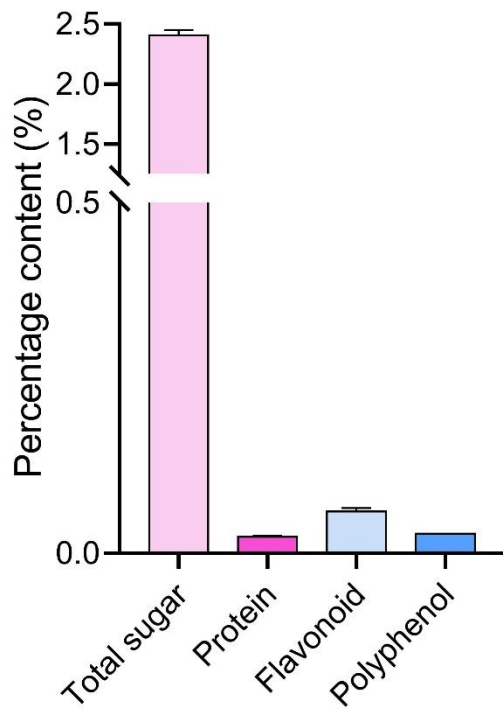

64

65 Supplementary Figure 3. Percentage content of Components in FHV water extract. The data were

66 presented as Mean  $\pm$  SD.

67
